# Supplementary material for: Functional Characterization of the Nemertide α Family of Peptide Toxins
Source: PubMed Central journal article supplement (PMC8406415; doi:10.1021/acs.jnatprod.1c00104), 2021-08-16
Supplement: np1c00104_si_001.pdf [file np1c00104_si_001.pdf]

# SUPPORTING INFORMATION FOR

## FUNCTIONAL CHARACTERIZATION OF THE NEMERTIDE $\alpha$ FAMILY OF PEPTIDE TOXINS

*Erik Jacobsson<sup>†\*</sup>, Steve Peigneur<sup>‡\*</sup>, Håkan S. Andersson<sup>†,§</sup>, Quentin Laborde<sup>†</sup>, Malin Strand<sup>^</sup>,*

*Jan Tytgat<sup>‡</sup> and Ulf Göransson<sup>†</sup>.*

† Pharmacognosy, Department of Pharmaceutical Biosciences, Biomedical Center, Uppsala

University, Box 591, SE-751 24, Uppsala, Sweden. ‡ Toxicology & Pharmacology,

University of Leuven (KU Leuven), O&N 2, PO Box 992, Herestraat 49, 3000, Leuven,

Belgium. § Department of Medical Biochemistry and Biophysics, Karolinska Institutet,

17177 Stockholm, Sweden. ^ Swedish Species Information Centre, Swedish University of

Agricultural Sciences, 75007 Uppsala, Sweden.

\* These authors contributed equally.

(ulf.goransson@farmbio.uu.se)



| <b>TABLE OF CONTENTS</b>                                                            | <b>Page</b> |
|-------------------------------------------------------------------------------------|-------------|
| <b>Figure S1. Purity of Nemertide <math>\alpha</math> toxins 1-7</b>                | <b>3</b>    |
| <b>Table S1. BgNav1 normalized activity of nemertide <math>\alpha</math> toxins</b> | <b>4</b>    |

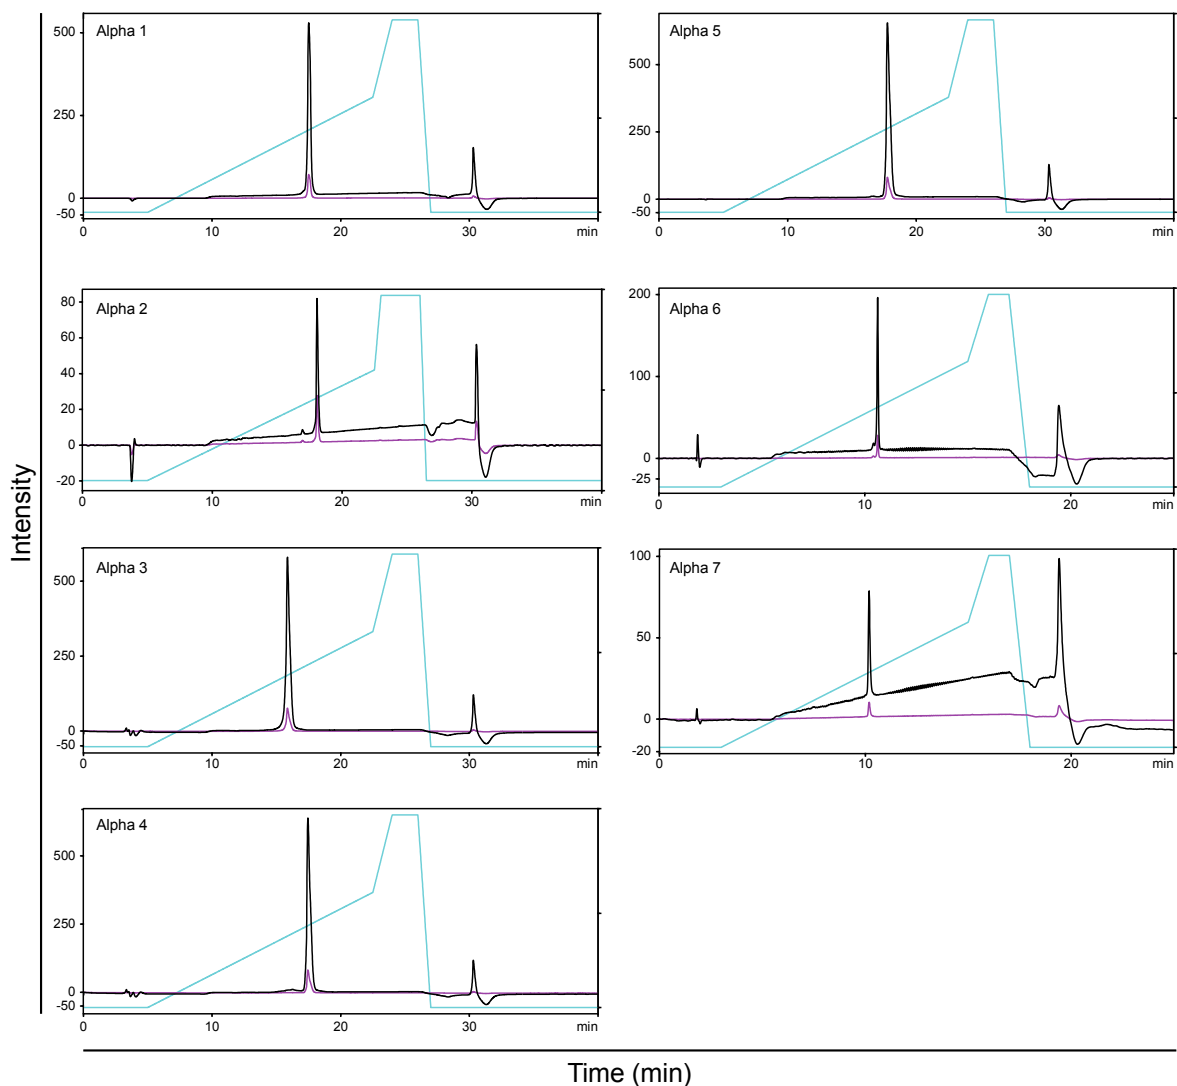

**Figure S1. Purity of nemertide  $\alpha$  toxins 1 - 7.** Absorbance at 215 nm in black and absorbance at 280 nm in magenta. MeCN gradient in light blue. Note that several systems were used for the purity determination (1-5 on Jupiter C18, 6-7 on Kinetex XB-C18), and that the retention times cannot be compared directly between samples.

**Table S1. BgNav1 normalized activity of nemertide  $\alpha$  toxins.**

| Nemertide                   | BgNav <sub>v</sub> 1* | BgNav <sub>v</sub> 1** | Nav1.1 | Nav1.2 | Nav1.3 | Nav1.4 | Nav1.5 | Nav1.6 | Nav1.7 | Nav1.8 |
|-----------------------------|-----------------------|------------------------|--------|--------|--------|--------|--------|--------|--------|--------|
| <b><math>\alpha</math>1</b> | 8.6 $\pm$ 2.9         | 1 (3.3)                | 14.4   | 41.8   | 15.7   | 16.9   | 16.1   | 28.0   | 8.9    | n.a.   |
| <b><math>\alpha</math>2</b> | 87.2 $\pm$ 10.5       | 1 (33.5)               | 1.4    | 1.1    | 1.5    | 13.2   | 1.7    | 15.6   | 14.9   | n.a.   |
| <b><math>\alpha</math>3</b> | 97.5 $\pm$ 15.6       | 1 (37.5)               | 1.3    | 1.4    | 1.4    | 1.5    | 1.1    | 1.0    | 1.0    | n.a.   |
| <b><math>\alpha</math>4</b> | 11.1 $\pm$ 1.6        | 1 (4.3)                | 8.3    | 12.1   | 1.2    | 1.3    | 2.5    | 11.1   | 7.3    | n.a.   |
| <b><math>\alpha</math>5</b> | 7.8 $\pm$ 3.2         | 1 (3.0)                | 13.1   | 20.0   | 1.2    | 2.0    | 17.0   | 8.6    | 9.4    | n.a.   |
| <b><math>\alpha</math>6</b> | 2.6 $\pm$ 0.3         | 1 (1.0)                | 3.0    | 9.3    | 40.6   | 17.8   | 82.8   | 14.0   | 37.4   | n.a.   |
| <b><math>\alpha</math>7</b> | 9.5 $\pm$ 1.2         | 1 (3.7)                | 18.1   | 5.3    | 17.9   | 85.3   | 16.4   | 15.5   | 13.6   | n.a.   |

\* non-normalized values (nM). \*\* relative activity to the most BgNav<sub>v</sub>1 active nemertide ( $\alpha$  6) in brackets. n.a.: not active.
